# Supplementary material
Source: PubMed Central journal article supplement (PMC6284402)
Supplement: NIHMS963660-supplement-supp.pdf [file NIHMS963660-supplement-supp.pdf]

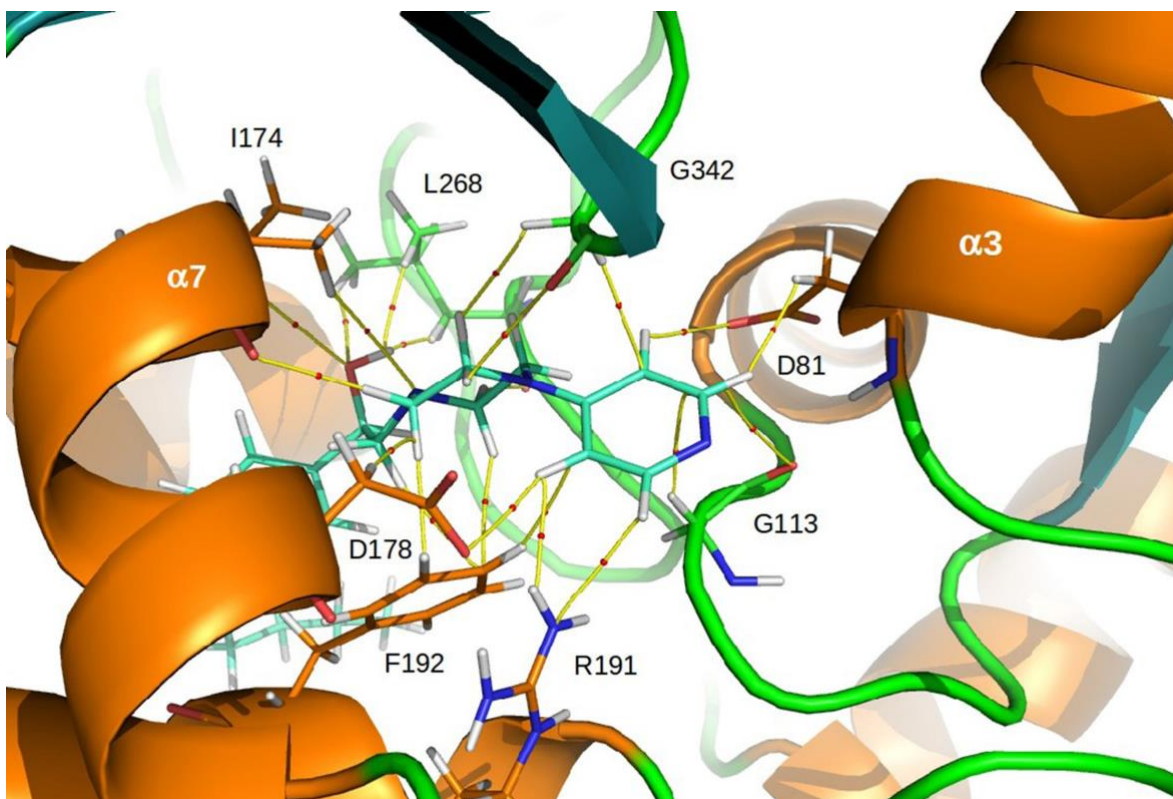

**S1:** Charge density molecular graph for the complex of SphK1 with compound **4** (in cyan). Yellow lines connecting the nuclei are the bond paths, and the small red spheres on them are the bond critical points (BCPs).

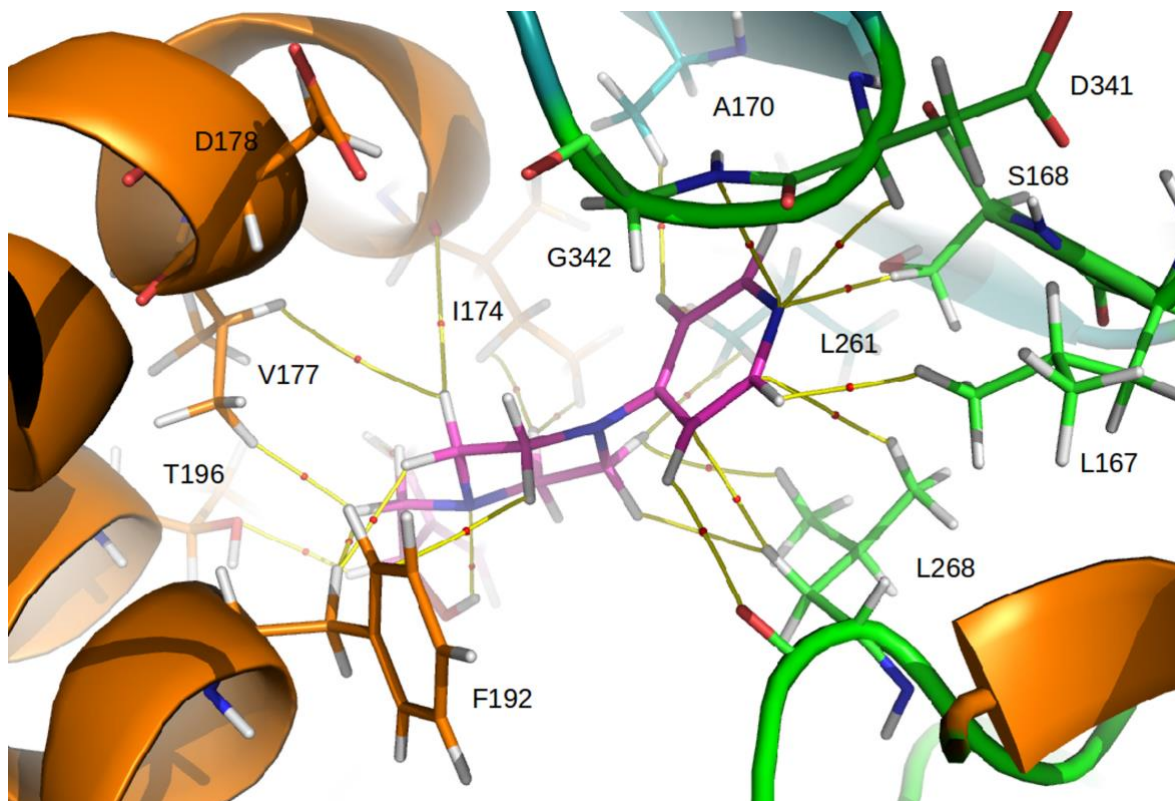

**S2:** Charge density molecular graph for the complex of SphK1 with compound **3** (in magenta). Yellow lines connecting the nuclei are the bond paths, and the small red spheres on them are the bond critical points (BCPs).
